# Supplementary material for: Ocular abnormalities in a large patient cohort with Retinitis Pigmentosa in Western China
Source: Research Square preprint supplement (doi:10.21203/rs.3.rs-63600/v4), 2021-01-07
Supplement: Supplementary file [file f07bc805638a016f3ac6c1ba.pdf]

**Supplemental Table 4** Classification of macular abnormalities in the study cohort of patients with retinitis pigmentosa stratifying by age

|            | Overall          |                     | ≤15years       |                    | 16-44years      |                     | 45-64years      |                     | ≥65years       |                    | $\chi^2$ | P value |
|------------|------------------|---------------------|----------------|--------------------|-----------------|---------------------|-----------------|---------------------|----------------|--------------------|----------|---------|
|            | Eyes<br>(n=1388) | Patients<br>(n=704) | Eyes<br>(n=78) | Patients<br>(n=39) | Eyes<br>(n=720) | Patients<br>(n=364) | Eyes<br>(n=533) | Patients<br>(n=271) | Eyes<br>(n=57) | Patients<br>(n=30) |          |         |
| <b>ERM</b> | 709<br>(51.1%)   | 418<br>(59.4%)      | 16<br>(20.5%)  | 11<br>(28.2%)      | 375<br>(52.1%)  | 220<br>(60.4%)      | 288<br>(54.0%)  | 170<br>(62.7%)      | 30<br>(52.6%)  | 17<br>(56.7%)      | 17.236   | 0.001*  |
| <b>CME</b> | 255<br>(18.4%)   | 150<br>(21.3%)      | 13<br>(16.7%)  | 7<br>(17.9%)       | 116<br>(16.1%)  | 69<br>(19%)         | 116<br>(21.8%)  | 68<br>(25.1%)       | 10<br>(17.5%)  | 6<br>(20.0%)       | 3.809    | 0.283   |
| <b>MH</b>  | 32<br>(2.3%)     | 26<br>(3.7%)        | 0<br>(0%)      | 0<br>(0%)          | 9<br>(1.3%)     | 7<br>(1.9%)         | 19<br>(3.6%)    | 16<br>(5.9%)        | 4<br>(7.0%)    | 3<br>(10.0%)       | 10.950   | 0.008*  |
| <b>VMT</b> | 33<br>(2.4%)     | 25<br>(3.6%)        | 0<br>(0%)      | 0<br>(0%)          | 17<br>(2.4%)    | 12<br>(3.3%)        | 15<br>(2.8%)    | 12<br>(4.4%)        | 1<br>(1.8%)    | 1<br>(3.3%)        | 1.595    | 0.619   |

ERM epiretinal membrane, CME cystoid macular oedema, MH macular hole, VMT vitreomacular traction syndrome

(\*)=Significant values

Note: MH and VMT were tested by Fisher exact method
